# Supplementary material for: A PtPdCu thin-film catalyst based on titanium nitride nanorod arrays with high catalytic performance for methanol electro-oxidation
Source: Royal Society of Chemistry journal article supplement (doi:10.1039/c6ra19388a), 2016-01-01
Supplement: c6ra19388a1.pdf [file c6ra19388a1.pdf]

Fig. S1

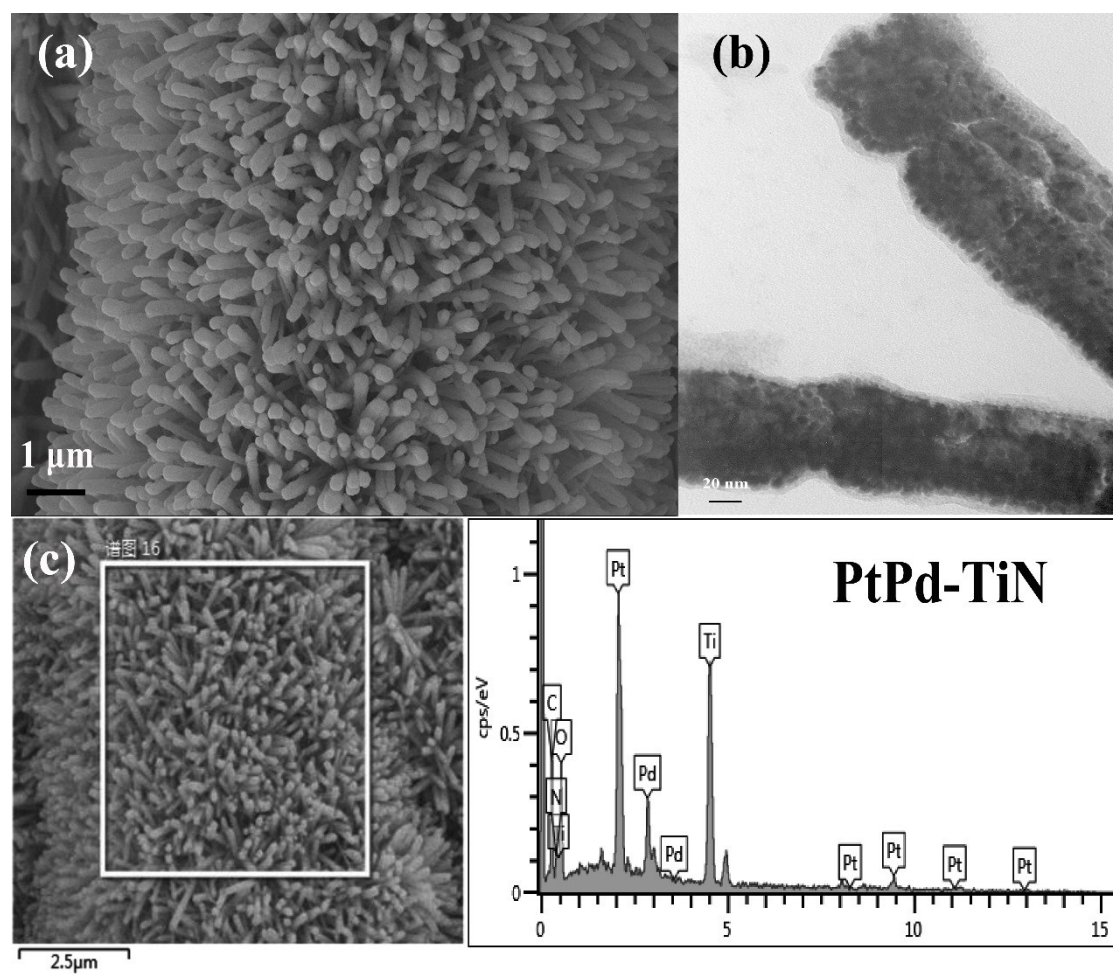

Fig. S1 FESEM image (a), TEM image (b), and EDX (c) of PtPd-TiN NRs

Fig. S2

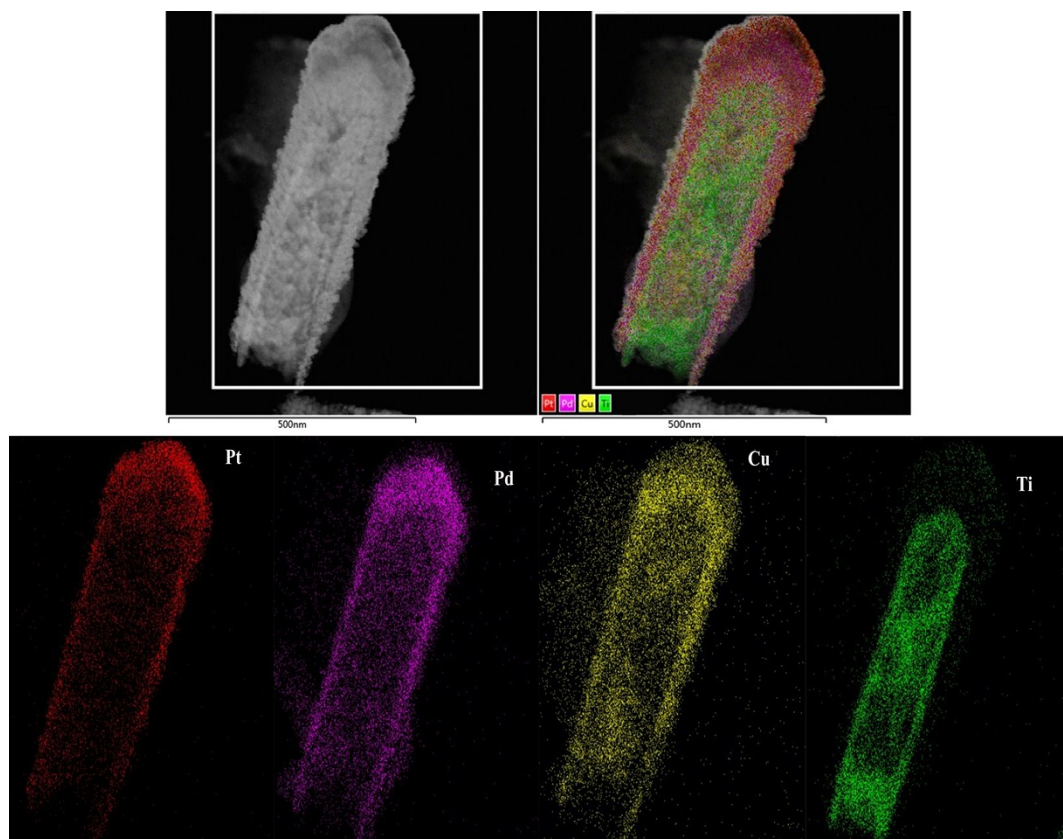

Fig. S2 HAADF-STEM characterization and elemental mapping of a PtPdCu-TiN NR.
